32 **Abstract: (180 words)**

33 Mutations in RNA binding proteins can lead to pleiotropic phenotypes including craniofacial, skeletal,  
34 limb and neurological symptoms. Heterogeneous Nuclear Ribonucleoproteins (hnRNPs) are involved  
35 in nucleic acid binding, transcription and splicing through direct binding to DNA and RNA, or through  
36 interaction with other proteins in the spliceosome. Here, we show a developmental role for *hnrnpul1* in  
37 zebrafish fin and craniofacial development, and in adult onset scoliosis. Furthermore, we demonstrate  
38 a role of *hnrnpul1* in alternative splicing regulation. In two siblings with congenital limb malformations,  
39 whole exome sequencing detected a frameshift variant in *HNRNPUL1*; the developmental role of this  
40 gene in humans has not been explored. Our data suggest an important developmental role of  
41 hnRNPUL1 in both zebrafish and humans. Although there are differences in phenotypes between  
42 species, our data suggests potential conservation of ancient regulatory circuits involving hnRNPUL1 in  
43 these phylogenetically distant species.

## 44 **Introduction**

45 Mutations in proteins involved in alternative splicing (AS) lead to spliceosomopathies in humans.  
46 Despite being expressed ubiquitously, mutations in core and alternative splicing factors can result in  
47 tissue-restricted, cell-type specific phenotypes including craniofacial, limb, skeletal and neurological  
48 syndromes (Lehalle et al., 2015). Tissue-specificity can occur because of the sensitivity of individual  
49 tissues during embryonic development to AS, such as sensitivity of the neural crest in the case of  
50 craniofacial anomalies (Lehalle et al., 2015). AS is the process of producing multiple different mRNA  
51 transcripts and protein isoforms through the differential selection of splice sites within a single pre-  
52 mRNA molecule. AS of pre-mRNA is carried out by the spliceosome, which is a complex of small  
53 nuclear RNAs and proteins. AS events mainly include exon skipping, intron retention and alternative 5'  
54 or 3' splice sites. For example, mutations in *TXNL4A* (Wieczorek et al., 2014), *EIF4A3* (Favaro et al.,  
55 2014), *EFTUD2* (Lines et al., 2012), *SF3B4* (Bernier et al., 2012) and *SNRPB* (Lynch et al., 2014)  
56 cause human spliceosomopathies (Lehalle et al., 2015).

57 Members of the heterogeneous nuclear ribonucleoprotein (hnRNP) family are involved in nucleic acid  
58 binding, splicing and transcription. They are present in the spliceosome and contribute directly and  
59 indirectly to the processing of pre-mRNA into mature mRNA, with nearly all hnRNP proteins having  
60 RNA-binding motifs (Dreyfuss et al., 1993; Geuens et al., 2016). Pathogenic variants associated with  
61 human disease have been discovered in hnRNP family members *HNRNPK* (Au et al., 2015) and  
62 *HNRNPU* (Poot, 2019). In particular, the hnRNPU family often act as repressors of mRNA splicing  
63 (Matlin et al., 2005). hnRNPU proteins are also involved in DNA repair (Hegde et al., 2012; Polo et al.,  
64 2012) and U2 snRNP maturation (Xiao et al., 2012). hnRNPUL1 (also known as E1B-AP5), is also a  
65 transcriptional repressor (Kzhyshkowska et al., 2003). As little is known about hnRNPUL1 function *in*  
66 *vivo*, we studied its developmental role in the zebrafish model. Zebrafish is an ideal model for this  
67 study due to conservation of developmental processes and genetic networks with human, coupled  
68 with rapid development.

69 Zebrafish craniofacial tendons share patterning and developmental pathways with mammalian  
70 tendons. Bone, cartilage and tendons of the face are derived from the neural crest. Developing  
71 tendons require expression of *scleraxis* (*scxa*) for specification, followed by expression of  
72 differentiation markers *tenomodulin* (*tnmd*) and *collagen* (*col1a*) (Chen and Galloway, 2014). Initial  
73 tendon specification is independent of interactions with cartilage or muscle. However, fish lacking the  
74 myogenic regulators *myod1* and *myf5* fail to maintain *scxa* expression. Mutants that lack cartilage  
75 (*sox9a* and *sox9b*) also show abnormal *scxa* expression. Thus signals produced by the developing  
76 muscle and cartilage are required for correct patterning and maintenance of tendons (Chen and

77 Galloway, 2014). Zebrafish mutations leading to a disruption of craniofacial tendon differentiation have  
78 been linked to jaw closure defects (Mcgurk et al., 2017).

79 Paired fins of teleosts (including zebrafish) are ancestral to limbs in tetrapods (including humans) as  
80 they are derived from locomotive organs in common ancestral vertebrates (Shubin et al., 1997).  
81 Specification of limb and fin bud tissue is marked by expression of *tbx5* as early as 14- 16 hours post  
82 fertilisation (hpf) in the zebrafish (Gibert et al., 2006). Following specification, at approximately 23-26  
83 hpf condensation of mesenchymal cells forms the fin bud. Similar to mammals, the fish fin develops an  
84 apical ectodermal ridge (AER) as a signalling center driving mesenchymal cell proliferation and  
85 growth. In fish, the AER transforms into the apical fold at approximately 36 hpf. The limb/fin bud  
86 actively grows as mesenchymal cells organise and begin to differentiate into muscle masses around  
87 46-48 hpf (Grandel and Schulte-Merker, 1998).

88 In this study, we model loss of function of zebrafish *hnrnpul1* to understand its developmental role. We  
89 identify a multi-tissue phenotype involving limb, craniofacial and skeletal abnormalities including  
90 idiopathic scoliosis. Through RNA sequencing and alternative splicing analysis we show that alterative  
91 splicing events are disrupted in zebrafish *hnrnpul1* mutants. We also identify a homozygous frameshift  
92 variant in Heterogeneous Nuclear Ribonucleoprotein U Like 1 (*HNRNPUL1*) gene in two siblings with  
93 craniofacial and limb anomalies underscoring the importance to better understand the role of this gene  
94 across vertebrate development.

95

## 96 **Results**

### 97 **Zebrafish *hnrnpul1* and *hnrnpul1l* loss of function mutations are homozygous viable**

98 hnRNPUL1 has been studied in cell lines, however there are no data on its role at the organismal and  
99 developmental level. Therefore, due to our interest in RNA binding proteins in human craniofacial  
100 anomalies, we wanted to understand whether mutations in *hnrnpul1* in an animal model would result in  
101 developmental anomalies. We use the zebrafish model because of ease of genetic analysis. Due to  
102 the genome duplication in the teleost lineage, there are two closely related *HNRNPUL1* orthologues in  
103 zebrafish, *hnrnpul1* and *hnrnpul1l* and therefore we used a double knockout strategy. Human  
104 HNRNPUL1 protein sequence shows 65% similarity with zebrafish Hnrnpul1 (chromosome 18) and  
105 67% with Hnrnpul1l (chromosome 5) respectively, with the DNA binding (SAP) and protein-protein  
106 interaction (SPRY) domains showing higher conservation (76% and 77% similarity for Hnrnpul1 and  
107 83% and 78% similarity for Hnrnpul1l in the SAP and SPRY domains; Fig. 1A). Two siblings with  
108 craniofacial and limb malformations (see results below) have a homozygous frameshift variant  
109 (NM\_007040.5:c.1673dup, p.(Glu560Argfs\*17)); thus, we targeted CRISPR guides to make loss of

110 function alleles in zebrafish with mutations near the human mutation site. To ensure loss of function  
111 mutation, a homology-directed repair 'stop cassette' with stop codons in three reading frames was  
112 included in the CRISPR-Cas9 injections. *hnrnpul1*<sup>Ca52</sup> and *hnrnpul1*<sup>Ca53</sup> and *hnrnpul1*<sup>Ca54</sup> alleles were  
113 isolated with mutations at homologous locations to the human mutation in the DNA (Fig. S1) and  
114 protein (Fig. 1B). *hnrnpul1*<sup>Ca52</sup> has a 106-nucleotide insertion, resulting in a frame shift mutation and  
115 premature stop codon (Fig. S1B). This is predicted to produce a nonsense protein mutation resulting  
116 in truncation after 3 amino acids (Fig. 1B). *hnrnpul1*<sup>Ca53</sup> has a 35-nucleotide insertion and *hnrnpul1*<sup>Ca54</sup>  
117 has a 63-nucleotide insertion (Fig. S1C, D). Both mutations result in a frame shift and premature stop  
118 codon resulting in truncation after 6 amino acids for Ca53 and 11 amino acids for Ca54 (Fig. 1B). All  
119 three alleles are predicted to result in truncated protein. No phenotypic differences in the Ca53 and  
120 Ca54 *hnrnpul1* alleles were noted.

121 We next determined the expression pattern of both *hnrnpul1* and *hnrnpul1l* in embryos at 24 hpf. We  
122 find that both transcripts are expressed ubiquitously (Fig. 1C,D), in line with previous reports of  
123 ubiquitous expression of *hnrnpul1* from 1 cell to Pec fin stage (60 hpf; Thisse and Thisse, 2004). No  
124 previous expression analysis is available for *hnrnpul1l*. *hnrnpul1* and *hnrnpul1l* mutations result in  
125 nonsense-mediated decay of the transcript as shown by whole mount *in situ* hybridisation (WISH)  
126 against *hnrnpul1* and *hnrnpul1l* in wild type, heterozygous and homozygous mutants (Fig. 1C,D),  
127 suggesting both are null alleles. Analysis of the gross morphology of *hnrnpul1* and *hnrnpul1l* double  
128 homozygous mutants (hereafter *hnrnpul1/1l* mutants) showed low frequency developmental  
129 abnormalities including edema and embryo curvature (Fig. S2), however viable and fertile adults were  
130 obtained for all allelic combinations including *hnrnpul1/1l* mutants.

131

### 132 ***hnrnpul1* mutation results in defects in fin growth but not fin specification**

133 To understand whether *hnrnpul1* is involved in fin development, a common system affected by  
134 disrupted AS, we first determined if there is normal specification of fins. We tested expression of the  
135 limb specification markers *gli3*, *hand2* and *tbx5* using WISH in *hnrnpul1/1l* mutants and found this is  
136 unchanged at 24-48 hpf (Fig. 2A-C'). We next analysed embryonic fin size by staining for *col1a1a*  
137 which localises to the apical fold of the developing fin bud at 48 hpf (Fig. 2D). *hnrnpul1/1l* mutants  
138 have significantly smaller fin bud area ( $1.0 \pm 0.4 \text{ mm}^2$ ) compared to wild types ( $1.3 \pm 0.4 \text{ mm}^2$ ,  
139  $p < 0.0001$ ; Fig. 2E). To ensure that decreased fin size was not due to defective overall growth we  
140 quantified eye size, but find no significant difference between *hnrnpul1/1l* mutants and wild types,  
141 suggesting that the growth defect, at this stage, is specific to the fin (Fig. 2F).

142 We next tested whether fin growth is deficient at larval stages. We used Alcian blue staining at 16 dpf.  
143 As larval fish differ in growth rates, we measured the fin length as a proportion of standard length (tip  
144 to tail) for each animal. We find that *hnrnpul1/1l* mutants have significantly shorter fins compared to  
145 wild type with  $12.8 \pm 0.7\%$  of body length in wild type animals and  $12.1 \pm 0.7\%$  of body length in  
146 *hnrnpul1/1l* mutant animals ( $p=0.0008$ ; Fig. 2G,H). Taken together, our data suggest that *hnrnpul1*  
147 and *hnrnpul1l* play a role in regulating fin growth in embryos and larvae, but not in initial fin bud cell  
148 specification.

149

### 150 ***hnrnpul1* mutation results in defects in craniofacial tendon development**

151 One of the most obvious phenotypes visible in *hnrnpul1/1l* mutant larvae is a gaping jaw at 8 dpf as  
152 compared wild types (Fig. 3A). We tested whether the gaping jaw is due to mispatterning of  
153 pharyngeal skeletal elements. Alcian blue staining showed cartilage is correctly patterned, but the  
154 lower jaw is ventrally displaced, leading to a significantly increased incidence of open jaw (wild type =  
155 10%, *hnrnpul1<sup>+/+</sup>*; *hnrnpul1l<sup>-/-</sup>* = 29%, *hnrnpul1<sup>+/-</sup>*; *hnrnpul1l<sup>-/-</sup>* = 38%, *hnrnpul1<sup>-/-</sup>*; *hnrnpul1l<sup>-/-</sup>* = 39%; Fig.  
156 3B-D).

157 As bone and cartilage development appeared normal, we analysed the development of tendons in the  
158 embryonic craniofacial region. Expression of *scleraxis* (*scxa*), a tendon specific marker, was used to  
159 visualise craniofacial tendons at 72 hpf. We find that *hnrnpul1/1l* mutants have a significantly shorter  
160 Sternohyoideus tendon (wild type =  $0.66 \pm 0.1 \mu\text{m}$ , *hnrnpul1/1l* =  $0.47 \pm 0.1 \mu\text{m}$ ,  $p < 0.0001$ ; Fig. 3E,  
161 F). The distance between the most anterior points of the Sternohyoideus tendons is also significantly  
162 narrower in *hnrnpul1/1l* mutants compared to wild types (wild type =  $0.35 \pm 0.09 \mu\text{m}$ , *hnrnpul1/1l* =  
163  $0.30 \pm 0.05 \mu\text{m}$ ,  $p=0.007$ ; Fig. 3G). However, we find no difference in other craniofacial tendons, the  
164 Adductor Mandibulae or Palatoquadrate tendons (Fig. S3). Craniofacial tendons develop from neural  
165 crest cell (NCC) populations therefore we analysed the expression of the NCC markers *foxd3* and  
166 *sox10*. Expression of these specification markers at 12 hpf was normal in *hnrnpul1/1l* mutants (Fig.  
167 S5). Thus, the specification of craniofacial bone and cartilage appears normal, but shortening of the  
168 Sternohyoideus tendon may contribute to the gaping jaw phenotype by not allowing the mandible to  
169 close properly.

170

### 171 ***hnrnpul1* mutation results in increased incidence of scoliosis in adult zebrafish**

172 We noted that young adult *hnrnpul1/1l* mutants show scoliosis at a high frequency. To determine  
173 whether this is congenital or idiopathic scoliosis we tested when scoliosis is first visible. 16 dpf larvae

174 were stained with Alcian blue to visualise the maturing spinal column. Although *hnrnpul1/1l* mutant  
175 larvae are significantly smaller (Fig. S4) the development of the spinal column and vertebral structure  
176 is normal and comparable to wild type fish at this stage (Fig. 4A). We next compared the incidence of  
177 scoliosis in mutants and wild types at 16 weeks, when they are sexually differentiated young adults.  
178 We carefully controlled housing density, a factor that influences growth rates. Fish were housed at a  
179 density of 10 per 3L tank from 4.5 weeks until 16 weeks of age, at which point they were sacrificed  
180 and processed for alizarin red staining to visualise bone. The relative severity of spinal curvature were  
181 scored as none, mild, moderate, or severe scoliosis (Fig. 4B). The incidence of scoliosis is significantly  
182 higher in *hnrnpul1/1l* mutants (76%) compared to wild types (28%,  $p < 0.0001$ ; Fig. 4C). There is no  
183 difference in the incidence of mild or moderate scoliosis. However, the most severe phenotype only  
184 occurs in *hnrnpul1/1l* mutants.

185 Overall, our data suggest that mutation of *hnrnpul1* and *hnrnpul1l* contributes to idiopathic scoliosis  
186 that develops in the larval period, and is visible in the young adult.

187

### 188 ***hnrnpul1/1l* mutation leads to disruptions in transcription and alternative splicing**

189 The hnRNP family regulates mRNA splicing, but knowledge of the specificity and targets of *hnrnpul1* is  
190 limited. Thus, we performed paired-end RNA sequencing (RNAseq) to identify differentially spliced  
191 events between wild type and *hnrnpul1/1l* mutant embryos at 3 dpf. This developmental stage was  
192 chosen as a stage when fins and tendons are actively differentiating. We used VAST-TOOLS to  
193 identify splice junctions and characterise splicing events (Irimia et al., 2014). We observed 76  
194 alternative splicing (AS) events: 25 skipped exons, 33 retained introns, 7 alternative 3' splice site and  
195 11 alternative 5' splice site changes (Fig. 5C,E. Table S1). The most differentially expressed exon in  
196 our AS analysis is exon 13 of *hnrnpul1l*, as expected from its excision via our CRISPR-Cas9  
197 mutagenesis (Fig 5A,B).

198 One of the goals of this analysis is to identify potential transcripts that might explain the phenotypes of  
199 *hnrnpul1/1l* mutants. Of interest, *basigin* (*bsg*) shows a 33% reduction in exon 2 usage in *hnrnpul1/1l*  
200 mutants compared to wild type. *F-box and leucine rich repeat protein 3* (*fbxl3b*) shows a 31% increase  
201 in exon 4 usage in *hnrnpul1/1l* mutants compared to wild type, while *telomeric repeat binding factor a*  
202 (*terfa*) shows a 17% increase in exon 12 usage (Fig. 5D). *Heat shock protein a 9* (*hspa9*) shows a  
203 37% increase in retention of intron 3-4, while *chromodomain helicase DNA binding protein 4a* (*chd4a*)  
204 shows a 14% increase in retention of intron 30–31 in *hnrnpul1/1l* mutants compared to wild type.  
205 *Pseudouridylylase 7* (*pus7*) shows a 24% reduction in the retention of intron 13 -14 in  
206 *hnrnpul1/1l* mutants compared to wild type (Fig. 5F).

207 Differential gene expression analysis using RPKM from VAST-TOOLS output, identified 311 genes  
208 downregulated by at least  $-1 \log_2$  fold change and 116 genes upregulated by at least  $1 \log_2$  fold  
209 change (Fig. 5G. Table S2). Ingenuity pathway analysis (QIAGEN, Redwood City, CA) identified the  
210 photoreceptor pathway as the top differentially expressed pathway, including the down regulation of  
211 *pde6c*, *prph2a* and *arl3l2*. We have not explored vision defects in our animals, as the patients we  
212 identified showed no eye deficiencies. We note that glypican 6a (*gpc6a*) expression is lower in  
213 *hnrnpul1/1l* mutants. *Gpc6a* is linked to omodysplasia in humans which includes shortening of  
214 extremities. Also of note is the lower expression of *growth differentiation factor 3 (gdf3)* in *hnrnpul1/1l*  
215 mutants, an important growth factor in vertebral and skeletal development.

216

### 217 **HNRNPUL1 as a candidate gene for human developmental anomalies**

218 Whole exome sequencing was conducted on two similarly affected sisters with craniofacial and limb  
219 abnormalities. These sisters were born to consanguineous first cousin parents of Arab descent. Given  
220 the similarity between the two sisters and that there was no family history of craniofacial or limb  
221 abnormalities, this suggested autosomal recessive or biallelic inheritance patterns. Our analysis  
222 identified the variant c.1673dup, p.(Glu560Argfs\*17) in the gene *HNRNPUL1*. This gene has not been  
223 previously associated with a known genetic condition. We did not detect any additional patients with  
224 variants in this gene using web-based tools such as Matchmaker exchange (Buske et al., 2015) or  
225 GeneMatcher, (<https://www.genematcher.org/>); (Sobreira et al., 2015); networks that facilitates the  
226 matching of phenotypes and genomics.

227

228 The probands both presented at birth with multiple skeletal malformations following uncomplicated  
229 pregnancies. The older sister was born to a 27-year-old G4P4 woman. Limb malformations were  
230 noted on a 27 week ultrasound. The child was born at 38 weeks gestation by spontaneous vaginal  
231 delivery with a birth weight of 3.8 kg (75-90<sup>th</sup> percentile). Outside of limb malformations and  
232 dysmorphic features, the child's neonatal examination and clinical course was unremarkable. She was  
233 born with bilateral short humeri, right absent ulna with two fixed in extension digits of the right hand;  
234 five rays present but with missing carpals, abnormal nails and dorsal creases on the left hand (Fig. 6A,  
235 B). Her lower limbs had mid shaft femoral pseudoarthroses, fused tibia to the femoral condyles,  
236 absent fibulas and abnormal toes (Fig. 6C, D). Her karyotype showed mosaic Turner syndrome, which  
237 is thought to be an incidental finding. Her course has been mostly uncomplicated except for orthopedic  
238 issues and intelligence is in the normal range. She is minimally dysmorphic with hypertelorism,  
239 upslanting palpebral fissures, prominent eyes and eyelashes and a high palate.

240



241 The younger sister was born at term to a 28-year-old G5P5 woman. Her birth weight was 4.03 kg (75-  
242 90<sup>th</sup> percentile) and a head circumference of 39.0 cm (+2.5 SD). She was stable as a neonate but  
243 briefly admitted to NICU for assessment of her malformations. She had bilateral fibular agenesis, short  
244 and bowed femurs and four metatarsals and tarsals bilaterally (Fig. 6F, G, and H). Upper limb  
245 development was normal (Fig. 6I) with the exception of the hands showing despite the presence of  
246 five rays, stiff index finger dorsal creases and abnormal nails progressively more severe from ray 5 to  
247 1. Her echocardiogram and abdominal ultrasounds were normal. She was felt to be minimally  
248 dysmorphic with a prominent forehead, relative macrocephaly, bitemporal narrowing, hypertelorism  
249 with prominent eyes and heavy eyelashes. Her palate was high but there was no clefting. Her clinical  
250 course has been mostly unremarkable outside of orthopedic complications and her intelligence is felt  
251 to be within the normal range. In addition to their skeletal malformations, both had bicornuate uterus,  
252 hirsutism, the first sister showed bilateral hydronephrosis, and the second sister showed Dandy  
253 Walker malformation. Clinically the girls share some features with Al-Awadi/Raas-  
254 Rothschild/Furhmann syndrome (OMIM 276820), which arises due to homozygous variants in *WNT7A*  
255 however *WNT7A* sequencing was negative.

256 Whole exome sequence analysis was undertaken as part of the Finding of Rare Disease Genes  
257 (FORGE) Canada consortium in both affected siblings. Variants were filtered based on rarity in the  
258 FORGE internal variant database and ExAC, along with predicted effects on protein function (Beaulieu  
259 et al., 2014). Given the family structure, a recessive mode of inheritance was favoured, although  
260 heterozygous variants present in both siblings were assessed since germline mosaicism could not be  
261 excluded. Rare homozygous variants were identified in both affected siblings in the *PODXL*, *CFTR*,  
262 *HNRNPUL1*, and *PRKD2* genes. The rare homozygous variant in the Podocalyxin-like gene  
263 (Chr7(GRCh37):g.131195974C>T, NM\_001018111.2(PODXL):c.319G>A, p.(Val107Met)) was not  
264 considered to be a likely causative candidate due to the fact that a biallelic loss of function variant in  
265 this gene was reported in an autosomal recessive juvenile Parkinson family (Sudhaman et al., 2016)  
266 and homozygous knockout in mouse results in perinatal lethality due to severe defects in kidney  
267 development and omphalocele. Limb development is normal in these embryos (Doyonnas et al.,  
268 2001). Likewise, the rare homozygous variant in protein kinase D2 gene  
269 (Chr19(GRCh37):g.47204104G>A, NM\_016457.4(PRKD2):c.1073C>T, p.(Ala358Val)) was not  
270 considered to be candidate as *in silico* analysis (SIFT, PolyPhen2, alignGVGD, MutationTaster) did  
271 not predict any damaging effect on the protein and either heterozygous or homozygous loss of PRKD2  
272 in Rhesus monkey and mouse, respectively, leads to hyperinsulinemia and insulin resistance without  
273 any reported congenital limb anomalies (Xiao et al., 2018).

274 The third homozygous variant was in the cystic fibrosis transmembrane conductance regulator gene  
275 (Chr7(GRCh37):g.117232214A>T, NM\_000492.3(CFTR):c.1993A>T, p.(Thr665Ser)). This variant  
276 has been reported as disease-associated in the literature where it has been found in the  
277 heterozygous state in two clinically affected individuals of Tunisian and Egyptian descent (Messaoud  
278 et al., 1996; Naguib et al., 2007). *In vitro* functional studies suggest potentially decreased chloride  
279 currents (Vankeerberghen et al., 1998) and a splice enhancer effect leading to partial exclusion of  
280 coding sequence (Aznarez et al., 2003). This finding was unexpected as neither affected individual  
281 presented with clinical features of cystic fibrosis, although this variant may be associated with a mild  
282 presentation. Given the paucity of clinical information on the impact of this variant in the literature, it is  
283 impossible to determine if homozygosity for this variant has any clinical impact. Nevertheless given the  
284 well studied nature of pathogenic variation in *CFTR* in humans, this gene is not a plausible candidate  
285 for the striking developmental anomalies in these siblings.

286 Lastly, the rare homozygous variant in heterogeneous nuclear riboprotein U-like 1  
287 (Chr19(GRCh37):g.41807595dup, NM\_007040.5(HNRNPUL1):c.1673dup, p.(Glu560Argfs\*17)) is  
288 predicted to result in a frameshift and premature stop approximately two-thirds of the way through the  
289 protein and may target the transcript for nonsense mediated decay. *HNRNPUL1* is depleted for loss  
290 of function variants in the general population. In the gnomAD database, *HNRNPUL1* has a probability  
291 of loss of function intolerance (pLI) of 1, suggesting that loss of function mutations in this gene may be  
292 poorly tolerated in humans (Karczewski et al., 2019) and no individuals with homozygous loss of  
293 function variants are reported. Segregation of this variant by Sanger sequence analysis of both  
294 affected individuals, both parents, and four unaffected siblings provided additional support to this  
295 variant where both parents were heterozygous for the c.1673dup variant while none of the four  
296 unaffected siblings were homozygous for this variant.

297

## 298 **Discussion**

299 Here we show that the phenotypes from loss of *hnrnpul1/1l* are pleiotropic in zebrafish, and affect  
300 multiple systems from craniofacial tendons to fin growth and skeletal morphology. We show that  
301 *hnrnpul1/1l* controls splicing and expression of mRNAs *in vivo*. We demonstrate that *hnrnpul1* and  
302 *hnrnpul1l* are ubiquitously expressed in embryonic zebrafish, but produce phenotypes in a tissue-  
303 specific manner. Tissue specific phenotypes likely occur through varying composition of components  
304 of the spliceosome within different tissues, and through varying target transcript expression in tissues  
305 (reviewed in (Baralle and Giudice, 2017)). Improvements in sequencing technology have helped  
306 identify many disease-causing AS mutations, consequently our understanding of how global genome  
307 mutations in splicing regulatory networks impact tissue-specific development and disease has also

308 expanded (Cieply and Carstens, 2015; Suzuki et al., 2019). We anticipate that each developmental  
309 phenotype we observe could be due to changes in multiple tissue-specific *hnrnpul1*, making  
310 mechanistic analysis complex, but affirming the multi-system role of AS genes.

311

### 312 **Involvement of Hnrnpul1 in fin growth**

313 The roles of genes that initiate limb specification, such as retinoic acid, *tbx5*, and *fgf10* are conserved  
314 across vertebrates (Mercader, 2007). However, in zebrafish *hnrnpul1/1l* mutants there is no change in  
315 expression or splicing of limb specification genes. Similarly, the siblings with the candidate variant  
316 have shortened limbs, rather than an absence of limbs. Our data suggest that the specification  
317 program is intact in zebrafish *hnrnpul1/1l* mutants and human patients, however the growth program  
318 may be impaired.

319

320 Growth of the limb occurs via proliferation of limb mesenchyme, driven by Fgf signals from the Apical  
321 Ectodermal Ridge (AER) in fish and tetrapods. Fgf10 induces Fgf8 via Wnt3 in chick, mouse and  
322 zebrafish (Mercader, 2007; Yano and Tamura, 2013). Although both fish and other vertebrates rely on  
323 Fgf signalling, the expression pattern of specific Fgfs is slightly different (reviewed in (Yano and  
324 Tamura, 2013)). We used RNA sequencing to identify transcripts and splice variants targeted by  
325 *hnrnpul1/1l* that might affect limb growth, and identified some interesting candidates. We identified  
326 differential alternative splicing between *hnrnpul1/1l* mutant and wild type fish in *basigin* (*bsg*; also  
327 known as CD147) exon 2. Bsg exon 2 encodes a 351 bp/ 117 amino acid immunoglobulin domain,  
328 one of 3 Ig domains present in this transmembrane glycoprotein. Exon 2 is also alternatively spliced in  
329 human Bsg (Karczewski et al., 2019). The effect of loss of exon 2 and this Ig domain has not been  
330 studied in any species. However Bsg/CD147 is stabilised by CBRN, a chaperone that can be bound  
331 by thalidomide, a known teratogen that reduces limb size (Eichner et al., 2016). Knockdown of  
332 *bsg/cd147* in zebrafish reduces pectoral fin size and phenocopies the teratogenic effects of  
333 thalidomide, suggesting that reduction in bsg expression impairs fin growth. Thalidomide is known to  
334 have anti-proliferative effects, while *bsg/CD147* promotes proliferation and invasiveness of cancer  
335 cells *in vitro* (Yang et al., 2017). It will require additional studies to determine whether AS of *bsg* exon2  
336 modulates its function in proliferation and growth of the fin/limb.

337

### 338 **Hnrnpul1 roles in craniofacial tendon development**

339 *hnrnpul1/1l* mutants have an unusual craniofacial phenotype of an open jaw. Despite apparent  
340 displacement of skeletal elements, we observed no defects in skeletal development. We thus

341 examined the development of tendons. Muscular and tendon development is coupled, as muscle  
342 attachment is required for the normal maturation of craniofacial tendons (Chen and Galloway, 2014)  
343 and mechanical load is needed for their differentiation (Brunt et al., 2017). Zebrafish embryos that are  
344 anaesthetised to prevent movement, show reduced jaw muscle activity and reduced tendon cell  
345 numbers in the jaw via reduced Wnt16 activity (Brunt et al., 2017). We observe a shorter  
346 Sternohyoideus tendon, a tendon that connects the Sternohyoideus muscle to the hyohyal junction at  
347 the second pharyngeal arch midline (Mcgurk et al., 2017). This region is referred to as the  
348 mandibulohyoid junction and is important for jaw opening. We find that tendons not associated with  
349 this junction (Adductor Mandibulae or Palatoquadrate tendons) show no difference in size, consistent  
350 with a specific defect in jaw tendon development at the midline as opposed to tendon development in  
351 general. A shorter Sternohyoideus tendon would hold the mandible open. Whether the Sternohyoideus  
352 is shorter due to decreased tenocyte specification and/or proliferation, or due to decreased activity and  
353 mechanical loading in *hnrnpul1/1l* mutants is unknown.

354

#### 355 **Development of Idiopathic scoliosis in *hnrnpul1* mutants**

356 The human patients are now entering adolescence and have not developed scoliosis, but we will  
357 continue to monitor them given that we noted an unexpected scoliosis phenotype in early adult  
358 *hnrnpul1/1l* zebrafish mutants. Scoliosis is defined as a three-dimensional rotation of the spine to an  
359 angle greater than 10°. Congenital scoliosis (CS) is present at birth arising due to a developmental  
360 abnormality, while idiopathic scoliosis (IS) develops during childhood or adolescence with no known  
361 cause (Goldstein and Waugh, 1973). The etiology of IS remains unknown but it does not appear to be  
362 due to vertebral abnormalities (Wajchenberg et al., 2016). Neurological, muscular, growth and even  
363 hormonal abnormalities may be associated with IS (reviewed in (Latalski et al., 2017)), however, no  
364 conclusive cause has been established. The fact that concordance is much higher in monozygotic  
365 twins than dizygotic twins does suggest a genetic link (Kesling and Reinker, 1997). Human IS has  
366 been difficult to study in mammalian models because common models such as mouse are  
367 quadrupeds and show a difference in spine structure and gravitational load (Ouellet and Odent, 2013).  
368 The zebrafish has recently emerged as an excellent model for IS, due to a similar cranial to caudal  
369 spinal load and the ease of genetic manipulation, which makes them susceptible to late onset spinal  
370 curvatures (Gorman and Breden, 2009). Therefore, we searched for a link between Hnrnpul1 proteins  
371 and known genes leading to scoliosis in zebrafish. Zebrafish mutants in *ptk7*, a regulator of Wnt  
372 signalling required in ciliated lineages for cilia motility, show late onset scoliosis. Defective  
373 cerebrospinal fluid (CSF) flow as a result of *ptk7* mutation leads to scoliosis, potentially by inducing  
374 neuroinflammation (Grimes et al., 2016; Hayes et al., 2014; Van Gennip et al., 2018). CSF circulation

375 is also important for circulation of neurotensin neuropeptides (Zhang et al., 2018) and  
376 mechanosensation by Pkd2l1 (Sternberg et al., 2018) and mutants in these genes develop IS. Thus,  
377 disruption in CSF circulation leads to multiple downstream consequences that can result in the failure  
378 of spine straightening. While we did not find changes in expression or splicing of *ptk7*, *urps* or *pkd2l1*  
379 using whole embryo RNA sequencing, it is possible that signal from tissue specific differences may  
380 have masked by using bulk sequencing of whole embryo tissue. However, we do find decreased  
381 expression of *gdf3* in *hnrnpul1/1l* mutants. Mutations in human *GDF3* cause skeletal abnormalities  
382 including vertebral fusion and in some patients, mild scoliosis (Ye et al., 2009). Additionally, as  
383 idiopathic scoliosis is late-developing, the RNAseq we undertook at 3 dpf may have been too early to  
384 detect changes relevant to motile cilia and CSF circulation. We did however find a decrease in  
385 expression of *arl3l2*. ARL3 proteins are present in the cilia and mutations lead to Joubert syndrome in  
386 humans (Alkanderi et al., 2018; Powell et al., 2019). Whether *arl3l2* plays a role in cilia activity in the  
387 zebrafish is currently unknown but may provide a mechanistic link between *hnrnpul1/1l* and scoliosis.

388

### 389 **Alternative splicing changes after loss of Hnrnpul1/1l**

390 Hnrnpul1 has been implicated, but never demonstrated, to be a protein involved in alternative splicing.  
391 We provide the first evidence for its role in AS in zebrafish by demonstrating alternative exon usage,  
392 intron retention, and alternative 3' and 5' splice sites in *hnrnpul1/1l* mutants.

393 Interestingly, we show that *hnrnpul1/1l* mutants are smaller at larval stages. Some of the genes we  
394 found with alternative splicing changes in zebrafish have been associated with short stature in  
395 humans. For instance human *PUS7* (de Brouwer et al., 2018), *CHD4A* (Weiss et al., 2016), and  
396 *FBXL3* are associated with short stature in humans, and are orthologs of *pus7*, *chd4a* and *fbxl3a*  
397 identified in our study (Ansar et al., 2019). The role of *hnrnpul1* in AS of *pus7* and *fbxl3a* should be  
398 investigated as possible causes of defective growth.

399 A large scale zebrafish mutagenesis screen identified *telemetric repeat factor a (terfa)* mutants as  
400 having a protruding jaw phenotype (Golling et al., 2002). Interestingly, *terfa* has altered AS in  
401 *hnrnpul1/1l* mutants. While the function of *terfa* in normal jaw development is not understood, it is  
402 possible that disrupted splicing of this gene could be contributing to the phenotype in *hnrnpul1/1l*  
403 mutants.

404 Identification of altered AS of *chd4a* in *hnrnpul1/1l* mutants is particularly interesting. CHD4, a  
405 chromodomain helicase DNA Binding protein also participates in DNA repair (Pan et al., 2012). Loss  
406 of CHD4 impairs recruitment of BRCA1 to sites of DNA damage. This is intriguing because a second  
407 known role for human HNRNPUL1 is directly in DNA repair. HNRNPUL1 is recruited by the MRN

408 complex to sites of DNA damage to promote DNA resection (Polo et al., 2012), a role separate from its  
409 AS and RNA activity that we have examined here. Control of DNA repair directly at the double strand  
410 break site as well as through AS of essential DNA repair regulators such as CHD4 highlights a  
411 potential dual role for HNRNPUL1 in DNA repair. Whether DNA repair defects contribute to any of the  
412 phenotypes in embryonic or adult zebrafish *hnrnpul1/1l* mutants could be investigated going forward.

413

#### 414 **Relationship of the zebrafish *hnrnpul1/1l* mutants to human variants in *HNRNPUL1***

415 We generated a zebrafish model for loss of *hnrnpul1/1l* genes prompted by the identification of two  
416 human siblings with a homozygous *HNRNPUL1* frameshift variant and skeletal and limb anomalies.  
417 As no animal loss of function model had been previously generated, our *hnrnpul1/1l* zebrafish mutants  
418 were used to test whether *hnrnpul1* mutants had disruptions in alternative splicing and conservation of  
419 phenotypic traits in limb and craniofacial development compared with the human patients with a  
420 variant in the orthologous gene. Our data suggests that *hnrnpul1* is a ubiquitously expressed gene that  
421 shows a remarkable conservation in function in zebrafish and humans. Despite tissue-specific  
422 differences, this suggests there are deep similarities in the regulatory circuits in which HNRNPUL1 is  
423 involved. Additional mechanistic experiments are needed to fully understand whether the patients'  
424 *HNRNPUL1* variant is the cause of their disease, as our analysis is correlative. The patients have  
425 variable loss and shortening of bones with some limbs unaffected and others severely affected.  
426 Overall, both parents show shortening of elements of the limb zeugopod (humerus and fibula) and  
427 variable agenesis of elements in the stylopod (ulna and tibia). The fish does not have correlates of  
428 these bones, however mesenchymal outgrowth that forms the fins and limbs (including bones) occurs  
429 via a homologous process.

430 Interestingly, the three strongest phenotypes in the zebrafish mutants (fin defects, craniofacial tendon  
431 development and scoliosis) all have links to Wnt signalling. The patients appear to have a very similar  
432 phenotype to Fuhrmann or Al-Awadi/Raas-Rothschild/Schinzel phocomelia syndromes, both caused  
433 by loss of WNT7A (Woods et al., 2006). Furthermore, pathogenic variants in WNT5A in humans lead  
434 to autosomal dominant Robinow syndrome, and mutations in its receptor ROR2 lead to recessive  
435 Robinow syndrome in humans (Person et al., 2010; Van Bokhoven et al., 2000). Robinow syndrome is  
436 characterised by craniofacial defects, short stature and vertebral segmentation defects. Although we  
437 have not detected members of the canonical Wnt pathway undergoing AS in *hnrnpul1* mutants, the  
438 phenotypes that we observe are very consistent with disruption of Wnt signalling. It is possible that  
439 Wnt is regulated secondarily through other *hnrnpul1* targets that are alternatively spliced, potentially  
440 including cilia genes such as *ar13l2*. Thus, even though the link is between *hnrnpul1* and regulation of

441 developmental processes also regulated by Wnt signaling is still unknown, the phenotypic similarities  
442 and affected developmental structures suggest similar underlying mechanisms should be explored.

443

444

445

## 446 **Materials and Methods**

### 447 **Animal and patient data**

448 All Zebrafish (*Danio rerio*) strains were maintained and raised under established protocols  
449 (Westerfield, 2000) and all animal procedures were approved by the University of Calgary Animal  
450 Care Committee (protocol AC17-0189). Zebrafish embryos were collected and incubated at 28.5°C in  
451 E3 medium (5 mM NaCl, 170 µM KCl, 330 µM CaCl<sub>2</sub>, 300 µM MgSO<sub>4</sub>, 223µM Methylene blue) and  
452 staged in hours post fertilisation (hpf) or days post fertilisation (dpf). When required endogenous  
453 pigmentation was inhibited from 24 hpf by addition of 0.003% 1-phenyl-2-thiourea (PTU, Sigma  
454 Aldrich) in E3 medium.

455 This study was part of the Finding of Rare Disease Genes in Canada (FORGE Canada) consortium  
456 and approved by the University of Calgary Conjoint Health Research Ethics Board (REB# 23927).

457 DNA was extracted from all family members from whole blood using Puregene chemistry (Qiagen).  
458 Exome capture was undertaken in both affected individuals using the SureSelect 50 Mb All Exon Kit  
459 v3 (Agilent) followed by sequencing with a HiSeq2000 (Illumina). Variant calling and annotation were  
460 as described in Lynch et al. (2014). Confirmation and segregation of the *HNRNPUL1* c.1406dup  
461 variant was performed by PCR amplification (HotStar Taq Plus, Qiagen, Toronto, ON) from genomic  
462 DNA and Sanger sequencing with the ABI BigDye Terminator Cycle Sequencing Kit v1.1 (Life  
463 Technologies, Burlington, ON) on a 3130xl genetic analyzer (Life Technologies). Sequence  
464 subtraction and analysis was performed using Mutation Surveyor software (SoftGenetics, State  
465 College, PA).

### 466 **Generation of *hnrnpul1* and *hnrnpul1l* mutant Zebrafish**

467 CRISPR mutations were created in both the *hnrnpul1* and *hnrnpul1l* genes by injection of guide RNAs  
468 at the single cell stage in conjunction with Cas9 mRNA and a homology-directed repair STOP cassette  
469 sequence oligonucleotide (Table S3). Guide RNAs were designed to target a location close to the  
470 human mutation. Founders were identified by genomic PCR analysis using primers in Table S3. DNA  
471 from F1 heterozygotes was cloned into pCR™Blunt II-TOPO® vector (Thermofisher) and sequenced.  
472 Mutants are genotyped by PCR using primers described in Table S3, detailed protocol in  
473 Supplementary methods.

474

### 475 **Whole mount *in situ* hybridisation (WISH)**

476 Embryos were fixed in 4% paraformaldehyde in PBS with 0.1% Tween-20 (PFA) at 4°C overnight and  
477 stored in 100% methanol at -20°C until required. All whole-mount *in situ* hybridisation was carried out



478 according to standard protocols (Lauter et al., 2011). Antisense probes for *hnrnpul1*, *hnrnpul1l*, *scxa*,  
479 *hand2*, *tbx5*, *foxd3* and *sox10* were produced by in vitro transcription using T7 polymerase (Roche), in  
480 the presence of digoxigenin-11-UTP (Sigma), from PCR fragments amplified from embryonic zebrafish  
481 cDNA (Table S3). Antisense probes for *gli3* and *col1a1a* were a gift from Peng Huang and produced  
482 from plasmid clones.

483

#### 484 **Alcian blue and Alizarin red staining**

485 Alcian blue staining of 16 dpf zebrafish was carried out as previously described (Walker and Kimmel,  
486 2007). In brief fish were fixed in 4% PFA overnight at 4°C and stained in 0.04% Alcian blue in 100 mM  
487 Tris-HCl/ 10 mM MgCl<sub>2</sub>. Following staining, fish were washed in decreasing concentration of  
488 Ethanol/100 mM Tris-HCl to remove excess stain. Fish were bleached in 3% H<sub>2</sub>O<sub>2</sub>/ 0.5% KOH until  
489 pigment was lost. Fish were then washed in increasing concentrations of glycerol in 1% KOH until  
490 100% glycerol. Fish were imaged in 100% glycerol.

491 Alizarin red staining of adult zebrafish was carried out as previously described (Connolly and Yelick,  
492 2010). In brief, adult zebrafish were eviscerated and fixed for 48hrs in 4% PFA at 4°C. Zebrafish were  
493 bleached in 30% H<sub>2</sub>O<sub>2</sub>/ 1% KOH for 2 hours followed by 2 hours in 15% H<sub>2</sub>O<sub>2</sub>/ 0.5% KOH. Zebrafish  
494 were cleared in 1% trypsin/2% borax solution overnight and stained in 1mg/ml alizarin red in 1% KOH  
495 over night. Following staining fish were washed in increasing concentrations of glycerol in 1% KOH  
496 until 100% glycerol. Fish were imaged in 100% glycerol.

497

#### 498 **RNA sequencing**

499 Zebrafish were genotyped from excised tail tissue, while matching head tissue from the same embryo  
500 was snap frozen at -80°C for RNA extraction after genotyping. Tails were exposed to 25mM NaOH at  
501 55°C for 30 minutes then neutralised with 40mM Tris HCl pH5 to extract genomic DNA (Meeker et al.,  
502 2007) followed by PCR genotyping. 8 embryos of each genotype were pooled per replicate and total  
503 RNA was purified using RNeasy Plus mini kit (Qiagen). Three replicates each of wild type sibling and  
504 *hnrnpul1/1l* mutants were sequenced using paired end reads on Illumina NextSeq500 to a read depth  
505 of ~100M reads. RNA libraries were prepared using NEBNext Ultra II Directional RNA Library Prep kit  
506 (New England Biolabs). Alternative splicing analysis of RNA sequencing data was completed using  
507 the Vertebrate Alternative Splicing and Transcript Tools (VAST-TOOLS) v2.2.2, using genome release  
508 danRer10 (Irimia et al., 2014). For all events, a minimum read coverage of 10 actual reads per sample  
509 was required, as described (Irimia et al., 2014). PSI values for single replicates were quantified for all

510 types of alternative events, including single and complex exon skipping events (S, C1, C2, C3, ANN),  
511 microexons (MIC), alternative 5'ss and 3'ss (Alt5, Alt3) and retained introns (IR-S, IR-C). A minimum  
512  $\Delta$ PSI of 10% was required to define differentially spliced events upon each knockdown, as well as a  
513 minimum range of 5% between the PSI values of the two samples.

514 Differential gene expression analysis was performed using RPKM output from VAST-TOOL analysis.  
515 For each gene p-values were determined by Student's T-test of RPKM values from 3 biological  
516 replicates.  $\log_2$  FC was calculated using the mean RPKM for each genotype. A  $\log_2$  FC of  $\leq -1$  or  $\geq 1$   
517 and a p-value of  $\leq 0.05$  were required to define a gene as differentially expressed.

518

### 519 **Imaging and analysis**

520 All images were taken on a Zeiss Stemi SV 11 microscope with a Zeiss Axiocam HRc camera. Area  
521 and length measurements were completed in ImageJ using the line and measure tools or Zen Blue  
522 (Zeiss) using the line tool.

### 523 **Statistical analysis**

524 All experiments were performed in at least 3 independent biological replicates. All quantitative data are  
525 presented as mean  $\pm$  standard deviation. Statistical analysis was performed using PRISM Graph Pad  
526 Software. ns,  $P > 0.05$ , \* $P \leq 0.05$ , \*\* $P \leq 0.01$ , \*\*\* $P \leq 0.001$ , \*\*\*\* $P \leq 0.0001$ .

527

### 528 **Acknowledgements:**

529 We would like to thank the patients and their family for participation in this research. We thank the  
530 Alberta Children's Hospital Research Institute for funding for DB and SF through the MORPH project.  
531 Operating funding was received from the Canadian Institute of Health Research Institute of Genetics  
532 Rare Disease Models and Mechanisms (180309-001-001) to SJC.

533 Patient sequencing was performed under the Care4Rare Canada Consortium funded by Genome  
534 Canada, the Canadian Institutes of Health Research, the Ontario Genomics Institute, Ontario  
535 Research Fund, Genome Alberta, Genome BC, Genome Quebec, and Children's Hospital of Eastern  
536 Ontario Foundation.

537 We would also like to thank the MORPH committee for guidance, and Juan Valcárcel Juárez and  
538 Wendy Dean for helpful comments on the manuscript.

539

### 540 **Competing interests:**

541 No competing interests declared.

542

543 **Data availability:**

544 All RNASeq reads have been deposited with the National Centre for Biotechnology Information in the  
545 Gene Expression Omnibus database and are available under the accession GSE144754.

546

547 **References**

548

549 **Alkanderi, S., Molinari, E., Shaheen, R., Elmaghloob, Y., Stephen, L. A., Sammut, V.,**  
550 **Ramsbottom, S. A., Srivastava, S., Cairns, G., Edwards, N., et al.** (2018). ARL3 Mutations  
551 Cause Joubert Syndrome by Disrupting Ciliary Protein Composition. *Am. J. Hum. Genet.* **103**,  
552 612–620.

553 **Ansar, M., Paracha, S. A., Serretti, A., Sarwar, M. T., Khan, J., Ranza, E., Falconnet, E.,**  
554 **Iwaszkiewicz, J., Shah, S. F., Qaisar, A. A., et al.** (2019). Biallelic variants in FBXL3 cause  
555 intellectual disability, delayed motor development and short stature. *Hum. Mol. Genet.* **28**, 972–  
556 979.

557 **Au, P. Y. B., You, J., Caluseriu, O., Schwartzentruber, J., Majewski, J., Bernier, F. P., Ferguson,**  
558 **M., Valle, D., Parboosingh, J. S., Sobreira, N., et al.** (2015). GeneMatcher Aids in the  
559 Identification of a New Malformation Syndrome with Intellectual Disability, Unique Facial  
560 Dysmorphisms, and Skeletal and Connective Tissue Abnormalities Caused by De Novo Variants  
561 in HNRNPK. *Hum. Mutat.* **36**, 1009–1014.

562 **Aznarez, I., Chan, E. M., Zielenski, J., Blencowe, B. J. and Tsui, L. C.** (2003). Characterization of  
563 disease-associated mutations affecting an exonic splicing enhancer and two cryptic splice sites in  
564 exon 13 of the cystic fibrosis transmembrane conductance regulator gene. *Hum. Mol. Genet.* **12**,  
565 2031–2040.

566 **Baralle, F. E. and Giudice, J.** (2017). Alternative splicing as a regulator of development and tissue  
567 identity. *Nat. Rev. Mol. Cell Biol.* **18**, 437–451.

568 **Beaulieu, C. L., Majewski, J., Schwartzentruber, J., Samuels, M. E., Fernandez, B. A., Bernier, F.**  
569 **P., Brudno, M., Knoppers, B., Marcadier, J., Dymont, D., et al.** (2014). FORGE Canada  
570 consortium: Outcomes of a 2-year national rare-disease gene-discovery project. *Am. J. Hum.*  
571 *Genet.* **94**, 809–817.

572 **Bernier, F. P., Caluseriu, O., Ng, S., Schwartzentruber, J., Buckingham, K. J., Innes, A. M., Jabs,**  
573 **E. W., Innis, J. W., Schuette, J. L., Gorski, J. L., et al.** (2012). Haploinsufficiency of SF3B4, a  
574 component of the pre-mRNA spliceosomal complex, causes nager syndrome. *Am. J. Hum.*  
575 *Genet.* **90**, 925–933.

576 **Brunt, L. H., Begg, K., Kague, E., Cross, S. and Hammond, C. L.** (2017). Wnt signalling controls  
577 the response to mechanical loading during zebrafish joint development. *Development* **144**, 2798–  
578 2809.

579 **Buske, O. J., Schiettecatte, F., Hutton, B., Dumitriu, S., Huang, L., Hartley, T., Girdea, M.,**  
580 **Sobreira, N., Mungall, C. and Brudno, M.** (2015). The Matchmaker Exchange API: automating  
581 patient matching through the exchange of structured phenotypic and genotypic profiles. *Hum.*  
582 *Mutat.* **36**, 922–927.

583 **Chen, J. W. and Galloway, J. L.** (2014). The development of zebrafish tendon and ligament  
584 progenitors. *Development* **141**, 2035–2045.

585 **Cieply, B. and Carstens, R. P.** (2015). Functional roles of alternative splicing factors in human  
586 disease. *Wiley Interdiscip. Rev. RNA* **6**, 311–326.

587 **Connolly, M. H. and Yelick, P. C.** (2010). High-throughput methods for visualizing the teleost  
588 skeleton: Capturing autofluorescence of alizarin red. *J. Appl. Ichthyol.* **26**, 274–277.

589 **de Brouwer, A. P. M., Abou Jamra, R., Körtel, N., Soyris, C., Polla, D. L., Safra, M., Zisso, A.,**  
590 **Powell, C. A., Rebelo-Guimar, P., Dinges, N., et al.** (2018). Variants in PUS7 Cause

- 591 Intellectual Disability with Speech Delay, Microcephaly, Short Stature, and Aggressive Behavior.  
592 *Am. J. Hum. Genet.* **103**, 1045–1052.
- 593 **Doyonnas, R., Kershaw, D. B., Duhme, C., Merkens, H., Chelliah, S., Graf, T. and McNagny, K.**  
594 **M.** (2001). Anuria, omphalocele, and perinatal lethality in mice lacking the CD34-related protein  
595 podocalyxin. *J. Exp. Med.* **194**, 13–27.
- 596 **Dreyfuss, G., Matunis, M., Piñol-Roma, S. and Burd, C.** (1993). hnRNP Proteins and the  
597 Biogenesis of mRNA. *Annu. Rev. Biochem.* **62**, 289–321.
- 598 **Eichner, R., Heider, M., Fernández-Sáiz, V., Van Bebber, F., Garz, A. K., Lemeer, S., Rudelius,**  
599 **M., Targosz, B. S., Jacobs, L., Knorn, A. M., et al.** (2016). Immunomodulatory drugs disrupt the  
600 cereblon-CD147-MCT1 axis to exert antitumor activity and teratogenicity. *Nat. Med.* **22**, 735–743.
- 601 **Favaro, F. P., Alvizi, L., Zechi-Ceide, R. M., Bertola, D., Felix, T. M., De Souza, J., Raskin, S.,**  
602 **Twigg, S. R. F., Weiner, A. M. J., Armas, P., et al.** (2014). A Noncoding expansion in EIF4A3  
603 causes richieri-costa-pereira syndrome, a craniofacial disorder associated with limb defects. *Am.*  
604 *J. Hum. Genet.* **94**, 120–128.
- 605 **Geuens, T., Bouhy, D. and Timmerman, V.** (2016). The hnRNP family: insights into their role in  
606 health and disease. *Hum. Genet.* **135**, 851–867.
- 607 **Gibert, Y., Gajewski, A., Meyer, A. and Begemann, G.** (2006). Induction and prepatterning of the  
608 zebrafish pectoral fin bud requires axial retinoic acid signaling. *Development* **133**, 2649–2659.
- 609 **Goldstein, L. A. and Waugh, T. R.** (1973). Classification and Terminology of Scoliosis. *Clin. Orthop.*  
610 *Relat. Res.* **9**, 10–22.
- 611 **Golling, G., Amsterdam, A., Sun, Z., Antonelli, M., Maldonado, E., Chen, W., Burgess, S., Haldi,**  
612 **M., Artzt, K., Farrington, S., et al.** (2002). Insertional mutagenesis in zebrafish rapidly identifies  
613 genes essential for early vertebrate development. *Nat. Genet.* **31**, 135–140.
- 614 **Gorman, K. F. and Breden, F.** (2009). Idiopathic-type scoliosis is not exclusive to bipedalism. *Med.*  
615 *Hypotheses* **72**, 348–352.
- 616 **Grandel, H. and Schulte-Merker, S.** (1998). The development of the paired fins in the Zebrafish  
617 (*Danio rerio*). *Mech. Dev.* **79**, 99–120.
- 618 **Grimes, D. T., Boswell, C. W., Morante, N. F. C., Henkelman, R. M., Burdine, R. D. and Ciruna, B.**  
619 (2016). Zebrafish models of idiopathic scoliosis link cerebrospinal fluid flow defects to spine  
620 curvature. *Science* **352**, 1341–1344.
- 621 **Hayes, M., Gao, X., Yu, L. X., Paria, N., Henkelman, R. M., Wise, C. A. and Ciruna, B.** (2014). Ptk7  
622 mutant zebrafish models of congenital and idiopathic scoliosis implicate dysregulated Wnt  
623 signalling in disease. *Nat. Commun.* **5**, 1–11.
- 624 **Hegde, M. L., Banerjee, S., Hegde, P. M., Bellot, L. J., Hazra, T. K., Boldogh, I. and Mitra, S.**  
625 (2012). Enhancement of NEIL1 protein-initiated oxidized DNA base excision repair by  
626 heterogeneous nuclear ribonucleoprotein U (hnRNP-U) via direct interaction. *J. Biol. Chem.* **287**,  
627 34202–34211.
- 628 **Irimia, M., Weatheritt, R. J., Ellis, J. D., Parikshak, N. N., Gonatopoulos-Pournatzis, T., Babor,**  
629 **M., Quesnel-Vallières, M., Tapial, J., Raj, B., O’Hanlon, D., et al.** (2014). A highly conserved  
630 program of neuronal microexons is misregulated in autistic brains. *Cell* **159**, 1511–1523.
- 631 **Karczewski, K. J., Francioli, L. C., Tiao, G., Cummings, B. B., Alföldi, J., Wang, Q., Collins, R. L.,**  
632 **Laricchia, K. M., Ganna, A., Birnbaum, D. P., et al.** (2019). Variation across 141,456 human  
633 exomes and genomes reveals the spectrum of loss-of-function intolerance across human protein-

- 634 coding genes. *bioRxiv* doi:10.1101/531210.
- 635 **Kesling, K. L. and Reinker, K. A.** (1997). Scoliosis in twins: A meta-analysis of the literature and  
636 report of six cases. *Spine* **22**, 2009–2015.
- 637 **Kzhyshkowska, J., Rusch, A., Wolf, H. and Dobner, T.** (2003). Regulation of transcription by the  
638 heterogeneous nuclear ribonucleoprotein E1B-AP5 is mediated by complex formation with the  
639 novel bromodomain-containing protein BRD7. *Biochem. J.* **371**, 385–393.
- 640 **Latalski, M., Danielewicz-Bromberek, A, Fatyga, M, Latalska, M, Kröber, M and Zwolak, P**  
641 (2017). Current insights into the aetiology of adolescent idiopathic scoliosis. *Arch. Orthop.*  
642 *Trauma Surg.* **137**, 1327–1333.
- 643 **Lauter, G., Söll, I. and Hauptmann, G.** (2011). Two-color fluorescent in situ hybridization in the  
644 embryonic zebrafish brain using differential detection systems. *BMC Dev. Biol.* **11**,.
- 645 **Lehalle, D., Wieczorek, D., Zechi-Ceide, R. M., Passos-Bueno, M. R., Lyonnet, S., Amiel, J. and**  
646 **Gordon, C. T.** (2015). A review of craniofacial disorders caused by spliceosomal defects. *Clin.*  
647 *Genet.* **88**, 405–415.
- 648 **Lines, M. A., Huang, L., Schwartzenruber, J., Douglas, S. L., Lynch, D. C., Beaulieu, C., Guion-**  
649 **Almeida, M. L., Zechi-Ceide, R. M., Gener, B., Gillessen-Kaesbach, G., et al.** (2012).  
650 Haploinsufficiency of a spliceosomal GTPase encoded by EFTUD2 causes mandibulofacial  
651 dysostosis with microcephaly. *Am. J. Hum. Genet.* **90**, 369–377.
- 652 **Lynch, D. C., Revil, T., Schwartzenruber, J., Bhoj, E. J., Innes, A. M., Lamont, R. E., Lemire, E.**  
653 **G., Chodirker, B. N., Taylor, J. P., Zackai, E. H., et al.** (2014). Disrupted auto-regulation of the  
654 spliceosomal gene SNRNP causes cerebro-costo-mandibular syndrome. *Nat. Commun.* **5**, 1–6.
- 655 **Matlin, A. J., Clark, F. and Smith, C. W. J.** (2005). Understanding alternative splicing: Towards a  
656 cellular code. *Nat. Rev. Mol. Cell Biol.* **6**, 386–398.
- 657 **Mcgurk, P. D., Swartz, M. E., Chen, J. W., Galloway, J. L. and Eberhart, J. K.** (2017). In vivo  
658 zebrafish morphogenesis shows Cyp26b1 promotes tendon condensation and musculoskeletal  
659 patterning in the embryonic jaw. *Plos Genet.* **13**,.
- 660 **Meeker, N. D., Hutchinson, S. A., Ho, L. and Trede, N. S.** (2007). Method for isolation of PCR-ready  
661 genomic DNA from zebrafish tissues. *Biotechniques* **43**, 610–614.
- 662 **Mercader, N.** (2007). Early steps of paired fin development in zebrafish compared with tetrapod limb  
663 development. *Dev. Growth Differ.* **49**, 421–437.
- 664 **Messaoud, T., Verlingue, C., Denamur, E., Pascaud, O., Quere, I., Fattoum, S., Elion, J. and**  
665 **Ferec, C.** (1996). Distribution of CFTR mutations in cystic fibrosis patients of Tunisian origin:  
666 Identification of two novel mutations. *Eur. J. Hum. Genet.* **4**, 20–24.
- 667 **Naguib, M. L., Schrijver, I., Gardner, P., Pique, L. M., Doss, S. S., Abu Zekry, M. A., Aziz, M. and**  
668 **Nasr, S. Z.** (2007). Cystic fibrosis detection in high-risk Egyptian children and CFTR mutation  
669 analysis. *J. Cyst. Fibros.* **6**, 111–116.
- 670 **Ouellet, J. and Odent, T.** (2013). Animal models for scoliosis research: State of the art, current  
671 concepts and future perspective applications. *Eur. Spine J.* **22**, S81–S95.
- 672 **Pan, M. R., Hsieh, H. J., Dai, H., Hung, W. C., Li, K., Peng, G. and Lin, S. Y.** (2012). Chromodomain  
673 helicase DNA-binding protein 4 (CHD4) regulates homologous recombination DNA repair, and its  
674 deficiency sensitizes cells to poly(ADP-ribose) polymerase (PARP) inhibitor treatment. *J. Biol.*  
675 *Chem.* **287**, 6764–6772.
- 676 **Person, A. D., Beiraghi, S., Sieben, C. M., Hermanson, S., Neumann, A. N., Robu, M. E.,**

- 677 **Schleiffarth, J. R., Billington, C. J., Van Bokhoven, H., Hoogeboom, J. M., et al.** (2010).  
678 WNT5A mutations in patients with autosomal dominant Robinow syndrome. *Dev. Dyn.* **239**, 327–  
679 337.
- 680 **Polo, S. E., Blackford, A. N., Chapman, J. R., Baskcomb, L., Gravel, S., Rusch, A., Thomas, A.,**  
681 **Blundred, R., Smith, P., Kzhyshkowska, J., et al.** (2012). Regulation of DNA-End Resection by  
682 hnRNPU-like Proteins Promotes DNA Double-Strand Break Signaling and Repair. *Mol. Cell* **45**,  
683 505–516.
- 684 **Poot, M.** (2019). HNRNPU: Key to Neurodevelopmental Disorders such as Intellectual Delay,  
685 Epilepsy, and Autism. *Mol. Syndromol.* **9**, 275–278.
- 686 **Powell, L., Samarakoon, Y. H., Ismail, S. and Sayer, J. A.** (2019). ARL3, a small GTPase with a  
687 functionally conserved role in primary cilia and immune synapses. *Small GTPases*  
688 doi:10.1080/21541248.2019.1703466.
- 689 **Shubin, N., Tabin, C. and Carroll, S.** (1997). Fossils, genes and the evolution of animal limbs. *Nature*  
690 **388**, 639–648.
- 691 **Sobreira, N., Schiettecatte, F., Boehm, C., Valle, D. and Hamosh, A.** (2015). New tools for  
692 mendelian disease gene identification: PhenoDB variant analysis module; and genematcher, a  
693 web-based tool for linking investigators with an interest in the same gene. *Hum. Mutat.* **36**, 425–  
694 431.
- 695 **Sternberg, J. R., Prendergast, A. E., Brosse, L., Cantaut-Belarif, Y., Thouvenin, O., Orts-**  
696 **Del’Immagine, A., Castillo, L., Djenoune, L., Kurisu, S., McDearmid, J. R., et al.** (2018).  
697 Pkd211 is required for mechanoreception in cerebrospinal fluid-contacting neurons and  
698 maintenance of spine curvature. *Nat. Commun.* **9**, 1–10.
- 699 **Sudhaman, S., Prasad, K., Behari, M., Muthane, U. B., Juyal, R. C. and Thelma, B. K.** (2016).  
700 Discovery of a frameshift mutation in podocalyxinlike (PODXL) gene, coding for a neural  
701 adhesion molecule, as causal for autosomal-recessive juvenile Parkinsonism. *J. Med. Genet.* **53**,  
702 450–456.
- 703 **Suzuki, H., Kumar, S. A., Shuai, S., Diaz-Navarro, A., Gutierrez-Fernandez, A., De Antonellis, P.,**  
704 **Cavalli, F. M. G., Juraschka, K., Farooq, H., Shibahara, I., et al.** (2019). Recurrent noncoding  
705 U1 snRNA mutations drive cryptic splicing in SHH medulloblastoma. *Nature* **574**, 707–711.
- 706 **Thisse, B. and Thisse, C.** (2004). hnrnpul1. *Fast Release Clones A High Throughput Expr. Anal.*  
707 *ZFIN Direct Data Submiss.*
- 708 **Van Bokhoven, H., Celli, J., Kayserili, H., Van Beusekom, E., Balci, S., Brussel, W., Skovby, F.,**  
709 **Kerr, B., Percin, E. F., Akarsu, N., et al.** (2000). Mutation of the gene encoding the ROR2  
710 tyrosine kinase causes autosomal recessive Robinow syndrome. *Nat. Genet.* **25**, 423–426.
- 711 **Van Gennip, J. L. M., Boswell, C. W. and Ciruna, B.** (2018). Neuroinflammatory signals drive spinal  
712 curve formation in zebrafish models of idiopathic scoliosis. *Sci. Adv.* **4**, 1–11.
- 713 **Vankeerberghen, A., Wei, L., Jaspers, M., Cassiman, J. J., Nilius, B. and Cuppens, H.** (1998).  
714 Characterization of 19 disease-associated missense mutations in the regulatory domain of the  
715 cystic fibrosis transmembrane conductance regulator. *Hum. Mol. Genet.* **7**, 1761–1769.
- 716 **Wajchenberg, M., Astur, N., Kanas, M. and Martins, D. E.** (2016). Adolescent idiopathic scoliosis:  
717 Current concepts on neurological and muscular etiologies. *Scoliosis Spinal Disord.* **11**, doi:  
718 10.1186/s13013-016-0066-y.
- 719 **Walker, M. B. and Kimmel, C. B.** (2007). A two-color acid-free cartilage and bone stain for zebrafish  
720 larvae. *Biotech. Histochem.* **82**, 23–28.

- 721 **Weiss, K., Terhal, P. A., Cohen, L., Bruccoleri, M., Irving, M., Martinez, A. F., Rosenfeld, J. A.,**  
722 **Machol, K., Yang, Y., Liu, P., et al.** (2016). De Novo Mutations in CHD4 , an ATP-Dependent  
723 Chromatin Remodeler Gene , Cause an Intellectual Disability Syndrome with Distinctive  
724 Dysmorphisms. *Am. J. Hum. Genet.* **99**, 934–941.
- 725 **Westerfield, M.** (2000). *The zebrafish book. A guide for the laboratory use of zebrafish (Danio rerio).*  
726 4th ed. Univ. of Oregon Press, Eugene.
- 727 **Wieczorek, D., Newman, W. G., Wieland, T., Berulava, T., Kaffe, M., Falkenstein, D., Beetz, C.,**  
728 **Graf, E., Schwarzmayr, T., Douzgou, S., et al.** (2014). Compound Heterozygosity of Low-  
729 Frequency Promoter Deletions and Rare Loss-of-Function Mutations in TXNL4A Causes Burn-  
730 McKeown Syndrome. *Am. J. Hum. Genet.* **95**, 698–707.
- 731 **Woods, C. G., Stricker, S., Seemann, P., Stern, R., Cox, J., Sherridan, E., Roberts, E., Springell,**  
732 **K., Scott, S., Karbani, G., et al.** (2006). Mutations in WNT7A cause a range of limb  
733 malformations, including fuhrmann syndrome and Al-Awadi/Raas-Rothschild/Schinzel  
734 phocomelia syndrome. *Am. J. Hum. Genet.* **79**, 402–408.
- 735 **Xiao, R., Tang, P., Yang, B., Huang, J., Zhou, Y., Shao, C., Li, H., Sun, H., Zhang, Y. and Fu, X. D.**  
736 (2012). Nuclear Matrix Factor hnRNP U/SAF-A Exerts a Global Control of Alternative Splicing by  
737 Regulating U2 snRNP Maturation. *Mol. Cell* **45**, 656–668.
- 738 **Xiao, Y., Wang, C., Chen, J. Y., Lu, F., Wang, J., Hou, N., Hu, X., Zeng, F., Ma, D., Sun, X., et al.**  
739 (2018). Deficiency of PRKD2 triggers hyperinsulinemia and metabolic disorders. *Nat. Commun.*  
740 **9**, 1–11.
- 741 **Yang, S., Qi, F., Tang, C., Wang, H., Qin, H., Li, X., Li, J., Wang, W., Zhao, C. and Gao, H.** (2017).  
742 CD147 promotes the proliferation, invasiveness, migration and angiogenesis of human lung  
743 carcinoma cells. *Oncol. Lett.* **13**, 898–904.
- 744 **Yano, T. and Tamura, K.** (2013). The making of differences between fins and limbs. *J. Anat.* **222**,  
745 100–113.
- 746 **Ye, M., Berry-Wynne, K. M., Asai-Coakwell, M., Sundaresan, P., Footz, T., French, C. R., Abitbol,**  
747 **M., Fleisch, V. C., Corbett, N., Allison, W. T., et al.** (2009). Mutation of the bone morphogenetic  
748 protein GDF3 causes ocular and skeletal anomalies. *Hum. Mol. Genet.* **19**, 287–298.
- 749 **Zhang, X., Jia, S., Chen, Z., Chong, Y. L., Xie, H., Feng, D., Wu, X., Song, D. Z., Roy, S. and Zhao,**  
750 **C.** (2018). Cilia-driven cerebrospinal fluid flow directs expression of urotensin neuropeptides to  
751 straighten the vertebrate body axis. *Nat. Genet.* **50**, 1666–1673.
- 752



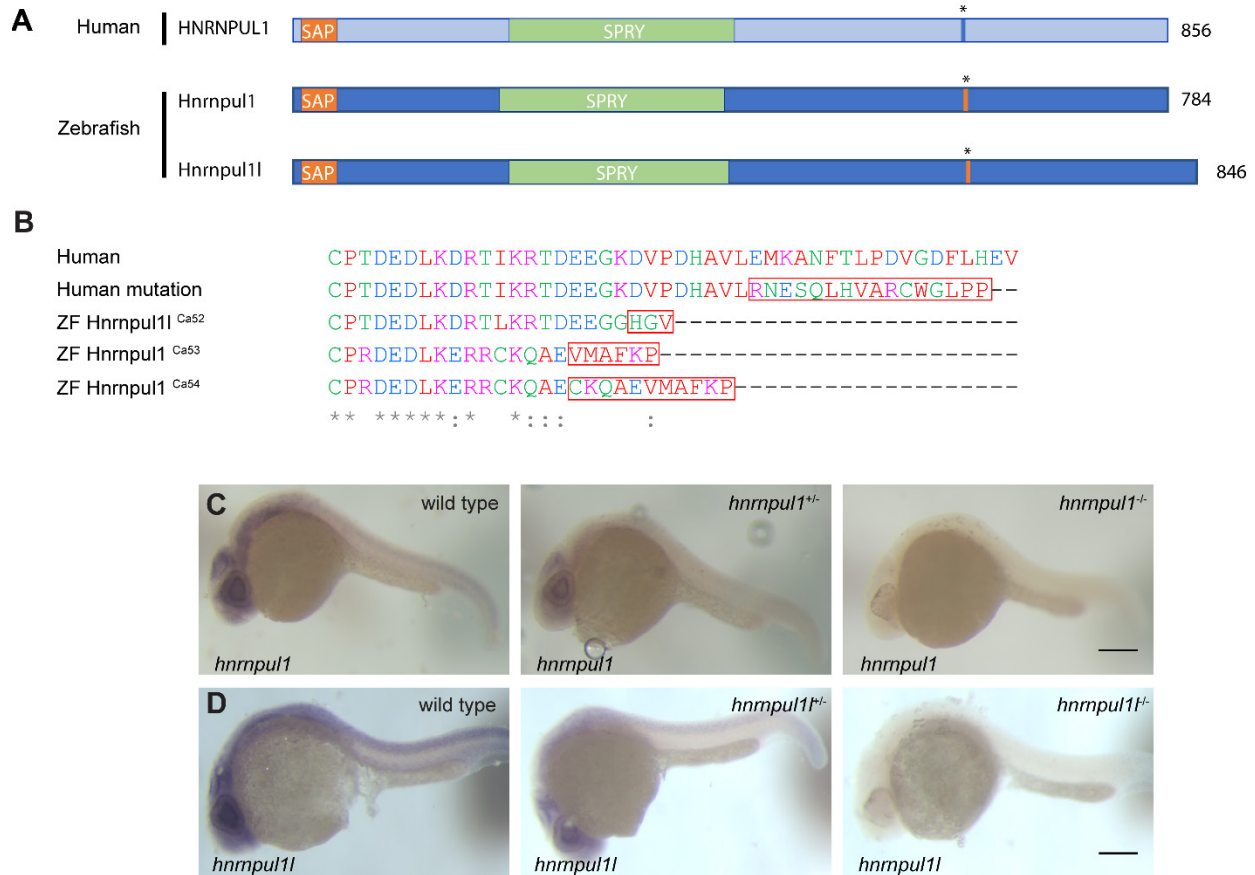

**Figure 1 – Mutation of human *HNRNPUL1* and zebrafish *hnrnpul1* and *hnrnpul11***

A) Schematic showing domains of human HNRNPUL1 and zebrafish Hnrnpul1 and Hnrnpul11 proteins. The mutation location in human HNRNPUL1 and equivalent sequence in zebrafish is marked by \*. B) Amino acid sequence of mutations, red boxes indicate nonsense sequence. C,D) whole mount *in situ* hybridisation (WISH) staining for *hnrnpul1*<sup>Ca52</sup> (C) and *hnrnpul11*<sup>Ca53</sup> (D), at 24 hpf reveals ubiquitous expression of both genes in wild types and nonsense mediated mRNA decay of mutant transcripts. Scale bars = 200  $\mu$ m.

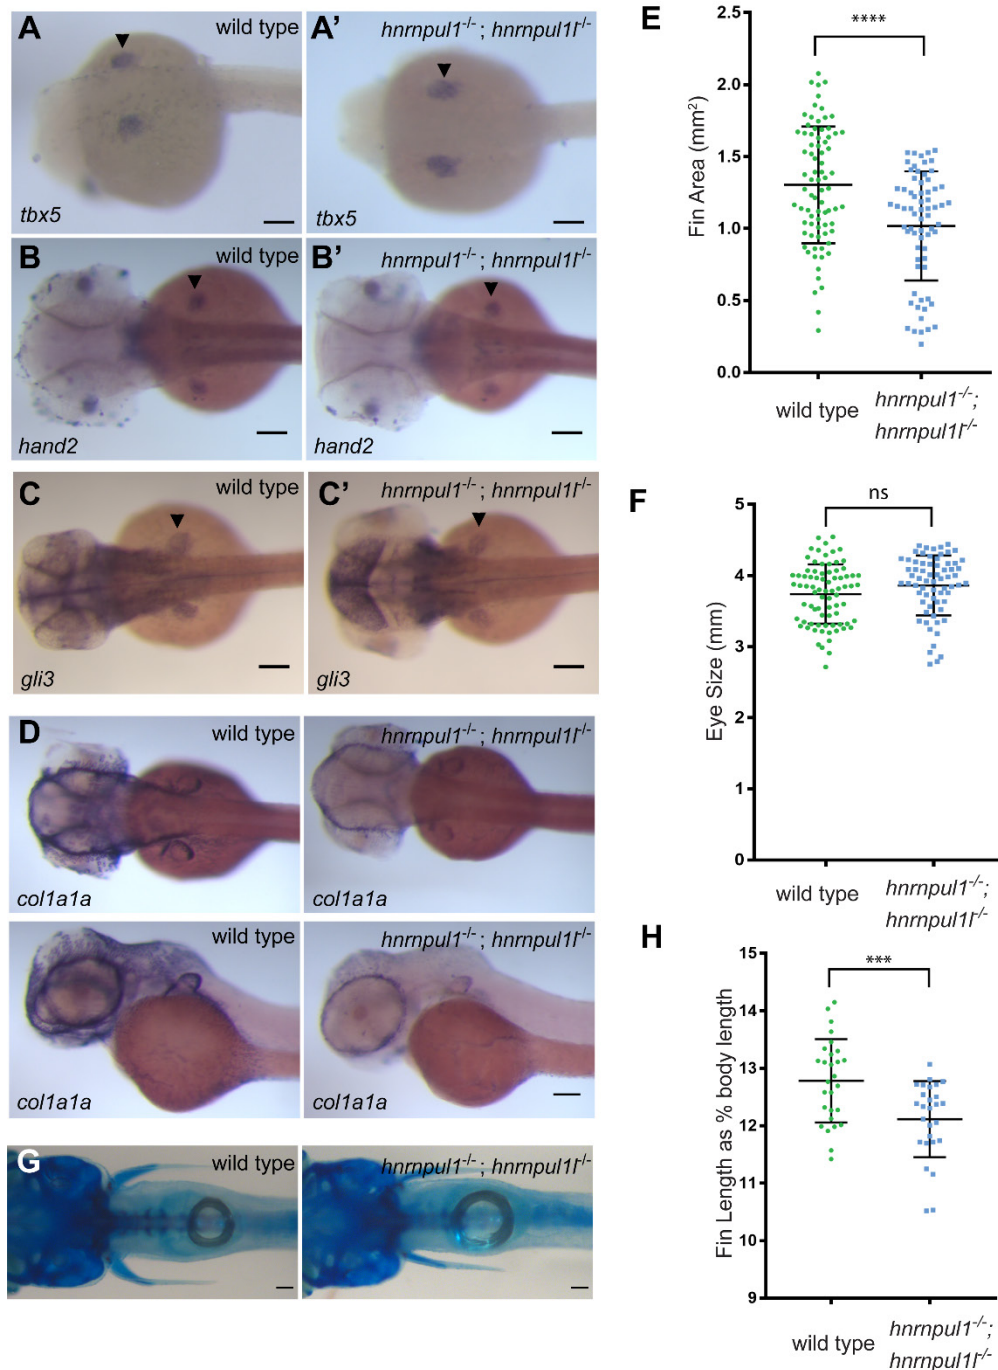

**Figure 2 – Loss of *hnrnpul1* and *hnrnpul1* does not affect fin specification, but leads to decreased fin growth in embryos and larvae**

A-C') WISH staining for fin specification markers *tbx5* (A, A') at 24 hpf, *hand2* (B, B') and *gli3* (C, C') at 48 hpf in wild type (A-C) and *hnrnpul1*<sup>-/-</sup>;*hnrnpul1*<sup>-/-</sup> double mutant (A'-C') embryos. D) WISH staining for *col1a1a* in wild type and *hnrnpul1*<sup>-/-</sup>;*hnrnpul1*<sup>-/-</sup> double mutant embryos at 49

hpf. E and F) Quantification of fin area or eye size in wild type and *hnrnpul1<sup>-/-</sup>;hnrnpul1<sup>-/-</sup>* double mutant *col1a1a* stained embryos at 49 hpf. Wild type n= 79, *hnrnpul1<sup>-/-</sup>;hnrnpul1<sup>-/-</sup>* n= 68, from 2 trials. G) Alcian blue cartilage staining of wild type and *hnrnpul1<sup>-/-</sup>;hnrnpul1<sup>-/-</sup>* double mutant fish at 16 dpf. H) Quantification of fin length at 16 dpf as a percentage of body length. Wild type n= 28, *hnrnpul1<sup>-/-</sup>;hnrnpul1<sup>-/-</sup>* n= 27, from 2 trials. Scale bars = 100  $\mu$ m. \*\*\*=P $\leq$ 0.001, \*\*\*\* = P $\leq$ 0.0001, ns = P>0.05, determined using Student's T-test.

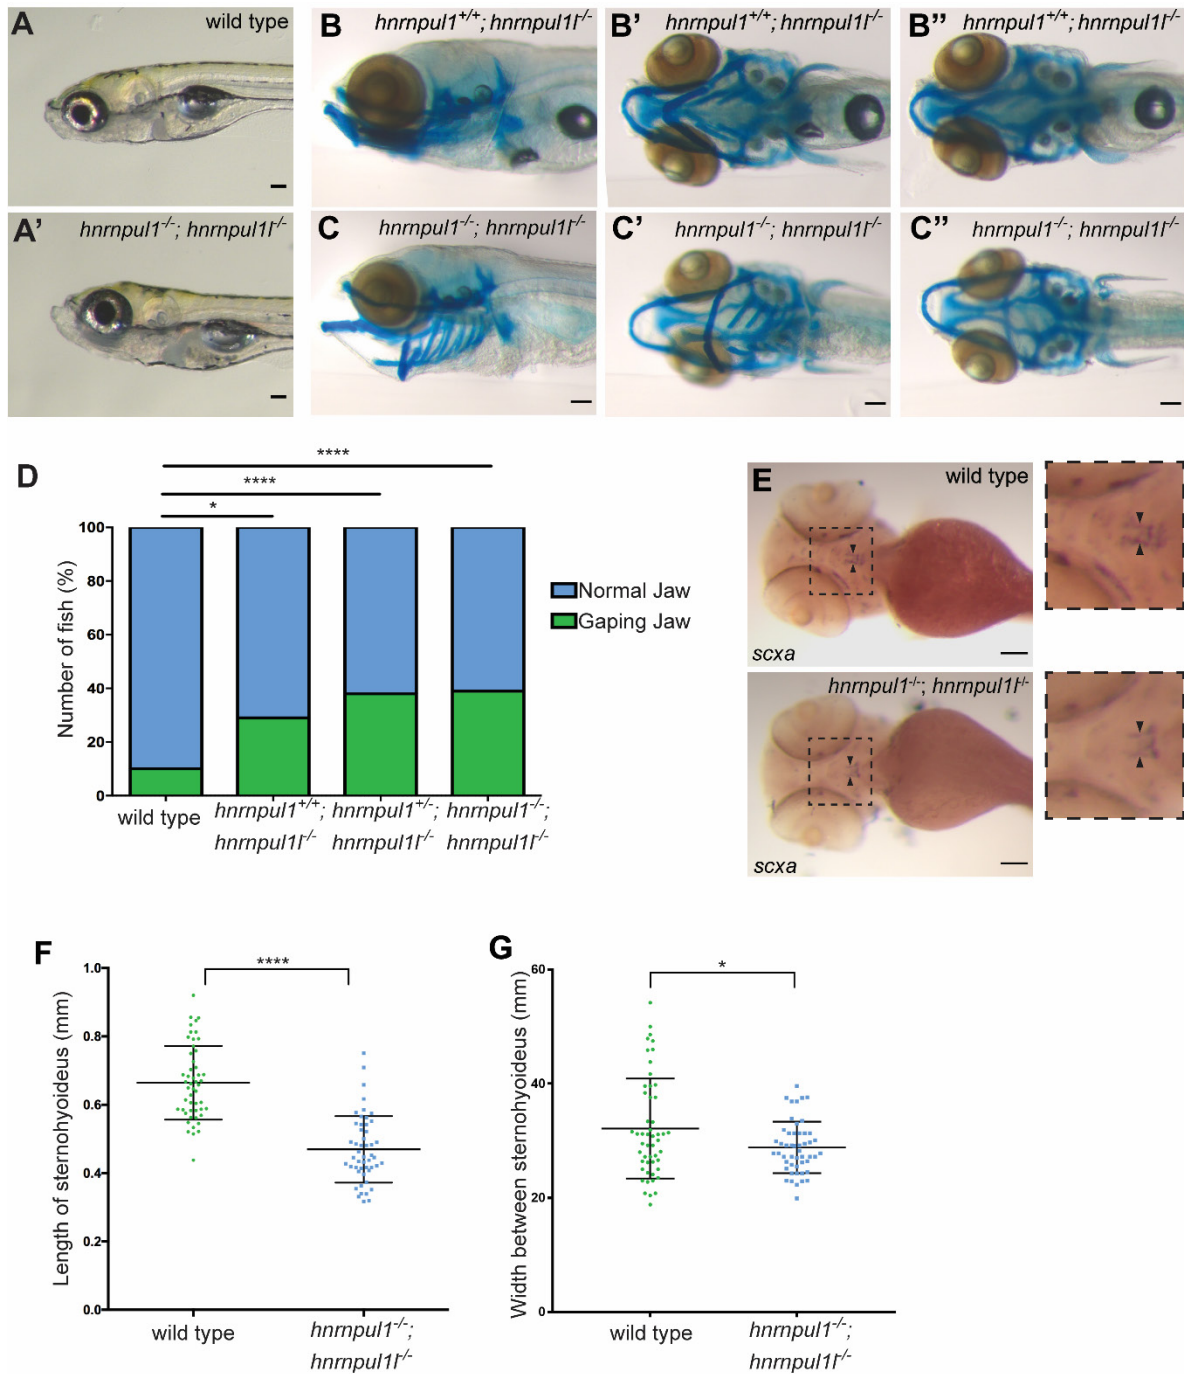

**Figure 3 – *hnrnp1/1* double mutants show a craniofacial phenotype due to shortened Sternohyoideus tendon**

A) Images of live 8 dpf wild type and *hnrnp1<sup>-/-</sup>; hnrnp1<sup>1/-</sup>* double mutant larvae. B-C'') Alcian blue staining at 8 dpf. Lateral (B, C), ventral (B', C') and dorsal (B'', C'') views shown. Example of

a normal jaw phenotype in *hnrnpul1*<sup>-/-</sup> single mutant (B) and a gaping jaw phenotype in *hnrnpul1*<sup>-/-</sup>;*hnrnpul1*<sup>-/-</sup> double mutant (C). D) Quantification of the proportion of fish showing a gaping jaw phenotype. Wild type n=283, *hnrnpul1*<sup>-/-</sup>; *hnRNPUL1*<sup>+/+</sup> n=24, *hnrnpul1*<sup>-/-</sup>; *hnrnpul1*<sup>+/-</sup> n=64, *hnrnpul1*<sup>-/-</sup>;*hnrnpul1*<sup>-/-</sup> n=84 from 5 trials. \* = P≤0.05, \*\*\*\* = P≤0.0001, determined by Fisher's test. E) WISH staining for *scleraxis* (*scxa*) in the Sternohyoideus tendon (arrow heads) in wild type and *hnrnpul1*<sup>-/-</sup>;*hnrnpul1*<sup>-/-</sup> double mutant embryos at 72 hpf. F, G) Quantification of the length of, and width between the Sternohyoideus tendons in wild type (n= 51) and *hnrnpul1*<sup>-/-</sup>; *hnrnpul1*<sup>-/-</sup> double mutant (n= 50) embryos, from 3 trials. Scale bars = 100 μm. \* = P≤0.05, \*\*\*\* = P≤0.0001 determined by Student's T-test.

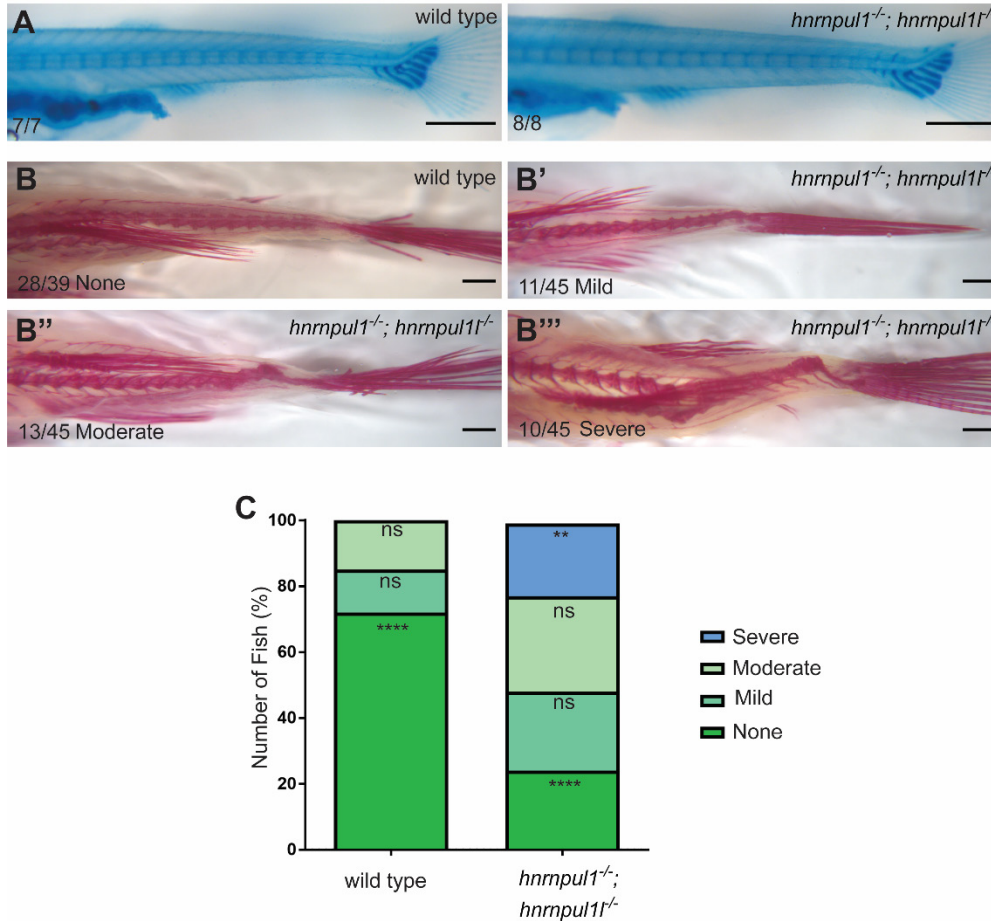

**Figure 4 – Loss of *hnrnpul1*; *hnrnpul1* leads to idiopathic scoliosis**

A) Alcian blue cartilage staining of wild type and *hnrnpul1<sup>-/-</sup>; hnrnpul1<sup>-/-</sup>* double mutant fish at 16 dpf showing normal larval spinal development. B-B''') Alizarin red bone staining of wild type (B) and *hnrnpul1<sup>-/-</sup>; hnrnpul1<sup>-/-</sup>* double mutant (B'-B''') fish at 16 weeks of age. Example images of relative mild (B'), moderate (B'') and severe (B''') scoliosis. C) Quantification of the proportion of fish with none, mild, moderate or severe scoliosis. Wild type n=18, *hnrnpul1<sup>-/-</sup>; hnrnpul1<sup>-/-</sup>* double mutant n=26, from 3 trials. \*\* = P≤0.01, \*\*\*\* = P≤0.0001 determined by Fisher's test. Scale bar = 500 μm (A) 1000 μm (B-B''').

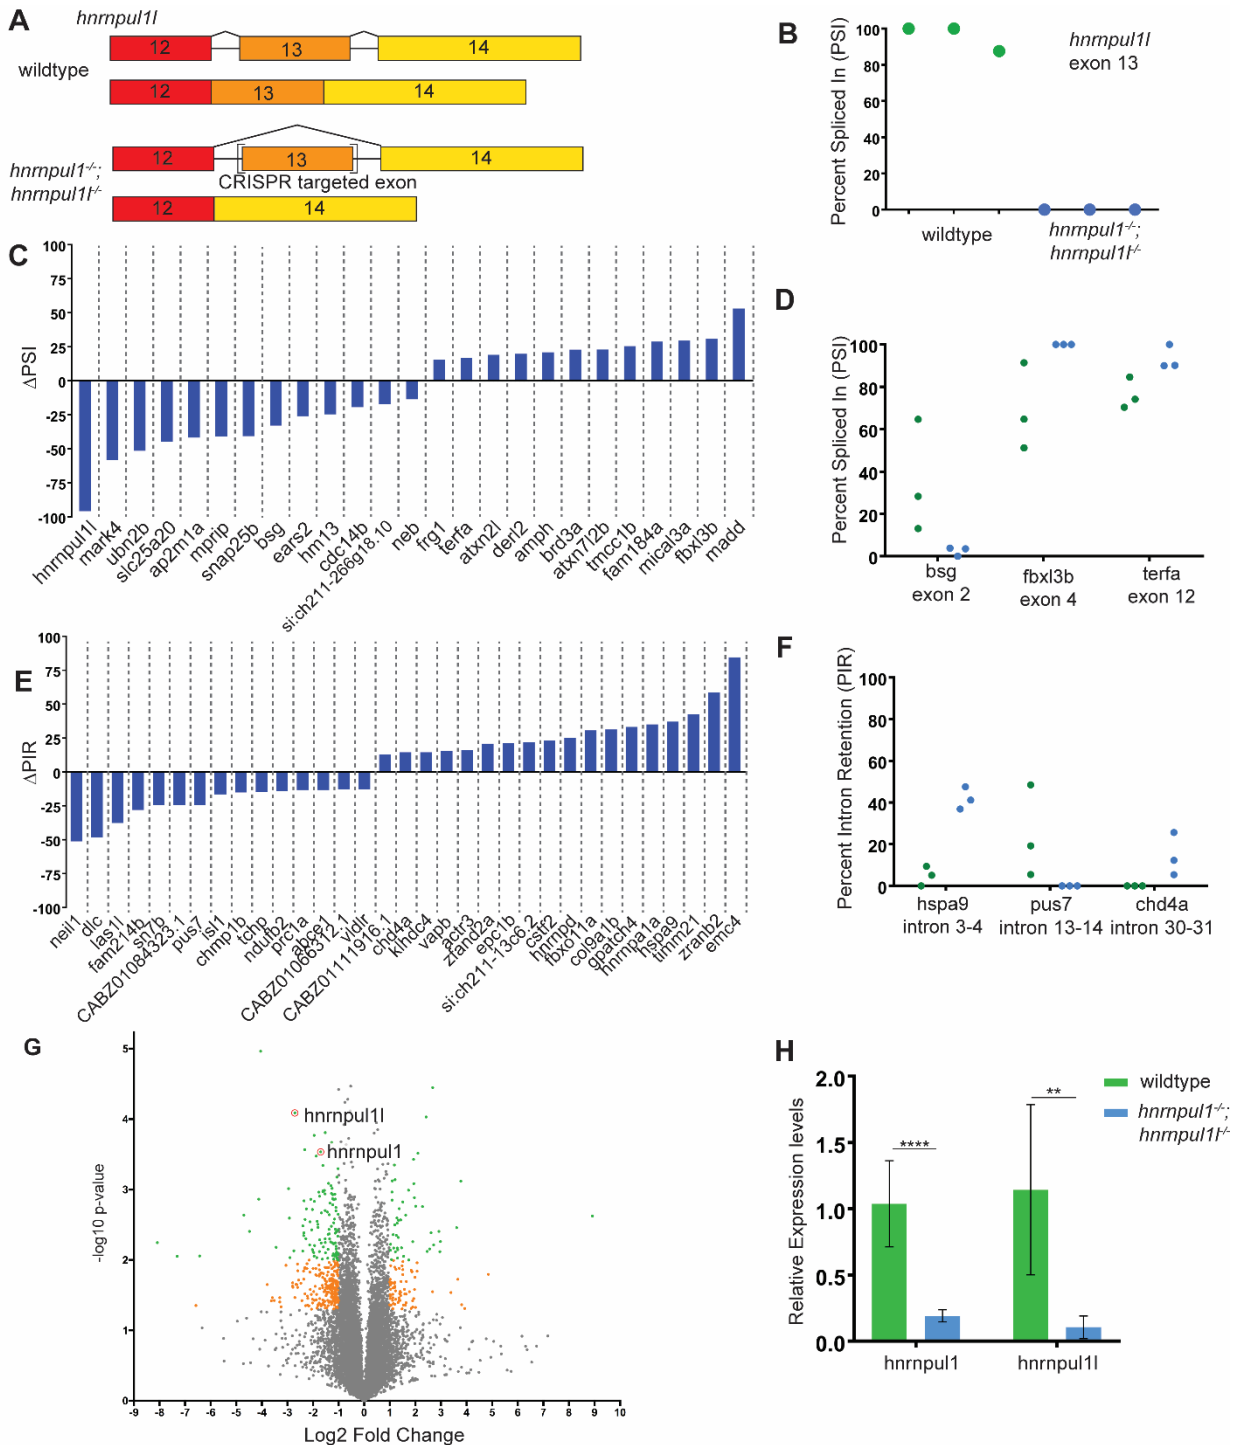

**Figure 5 – Loss of *hnrnpul1*; *hnrnpul1* leads to differential splicing**

A) Schematic showing the processing of *hnrnpul1* to form standard transcript and alternative splicing of exon 13 of the *hnrnpul1* gene as a result of CRISPR-Cas9 targeted mutagenesis. B) Percent Spliced In (PSI) for exon 13 of *hnrnpul1* in wild type and *hnrnpul1*<sup>-/-</sup>; *hnrnpul1*<sup>-/-</sup> double

mutant embryos at 3 dpf. C) Change in PSI of all exon skipping events in *hnrnpul1*<sup>-/-</sup>; *hnrnpul1*<sup>-/-</sup> double mutant embryos compared to wild type. D) Detailed view of PSI of genes associated with phenotypes, points represent each biological replicate. E) Change in Percent Intron Retention (PIR) of all intron retention events in *hnrnpul1*<sup>-/-</sup>; *hnrnpul1*<sup>-/-</sup> double mutant embryos compared to wild type. F) Detailed view of PIR of genes associate with phenotypes, points represent each biological replicate. Details of affected exon/intron in Table S1. G) Volcano plot showing all differentially expressed genes. Grey points =  $1 > \text{Log}_2 \text{FC} > -1$  or  $P > 0.05$ , orange points =  $1 < \text{Log}_2 \text{FC} < -1$  and  $P \leq 0.05$ , green points =  $1 < \text{Log}_2 \text{FC} < -1$  and  $P \leq 0.01$ . H) qPCR validation of knock down of *hnrnpul1* and *hnrnpul1l* expression in *hnrnpul1*<sup>-/-</sup>; *hnrnpul1*<sup>-/-</sup> double mutant embryos at 3 dpf compared to wild type. \*\* =  $P \leq 0.01$ , \*\*\*\* =  $P \leq 0.0001$ .



Older sibling

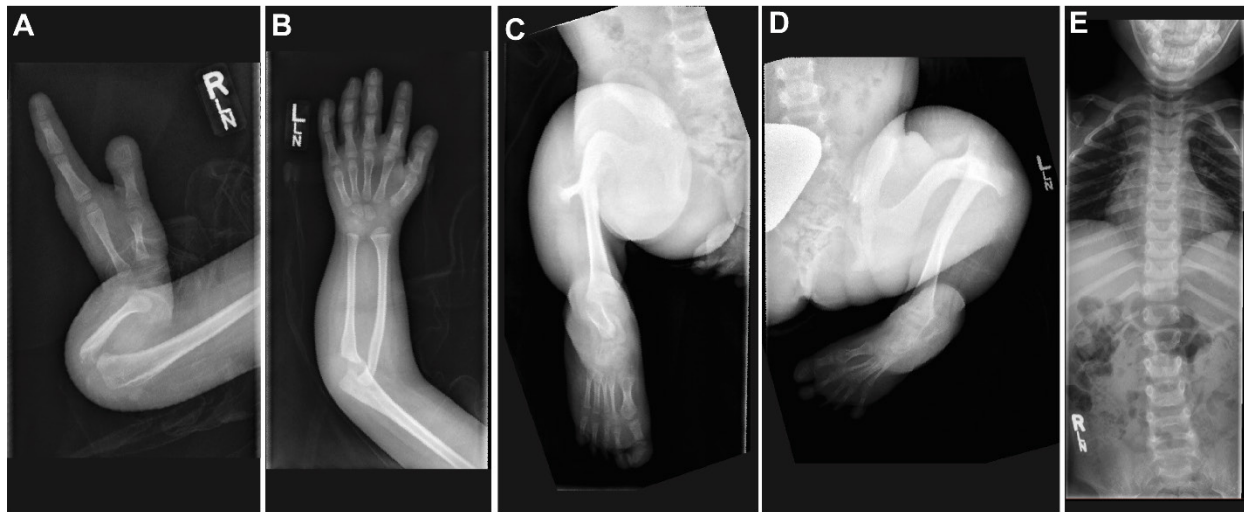

Younger sibling

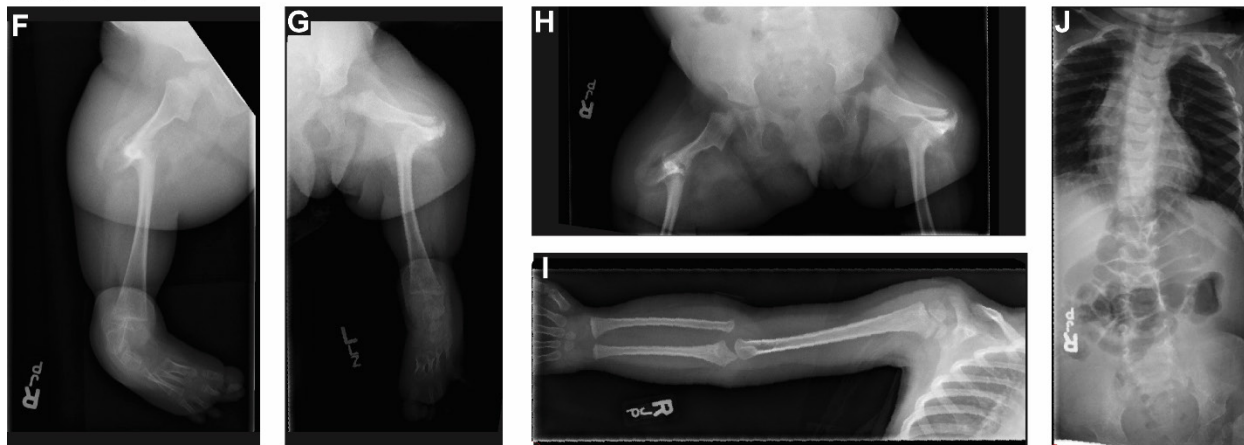

**Figure 6 - Radiographic features of affected siblings.**

A-E) Xray images of older sibling. Right arm showing short humerus and absent ulna with 2 fixed in extension digits of the right hand (A). Left arm showing short humerus and normal upper arm (B). Right (C) and Left (D) legs showing mid shaft femoral pseudoarthroses, fused tibia to the femoral condyles, absent fibulas and abnormal toes. F-J) X-ray images of the younger sibling. Right (F) and Left (G) legs showing bilateral fibular agenesis, short and bowed femurs and four metatarsals and tarsals (H). Right arm (I) showing normal upper limb development.
